# Supplementary material
Source: publisher site journal article supplement (https://www.spandidos-publications.com/8438/downloadSupplementary)
Supplement: Supplementary file 1 [file downloadSupplementary]

Table SI. R package and hyperparameters in R for each model.

| Model                              | R package             | Hyperparameters for variable selection                 | Hyperparameters for prediction                           |
|------------------------------------|-----------------------|--------------------------------------------------------|----------------------------------------------------------|
| <b>Lasso + StepCox [both]</b>      | glmnet, survival      | family = "cox", alpha = 1, lambda = cv.fit\$lambda.min | direction = both, trace = 0                              |
| <b>survival-SVM</b>                | survivalsvm           |                                                        | gamma.mu = 1, opt.meth = "ipop"                          |
| <b>CoxBoost + survival-SVM</b>     | CoxBoost, survivalsvm | start.penalty=500, maxstepno=500                       | gamma.mu = 1, opt.meth = "ipop"                          |
| <b>Ridge</b>                       | glmnet                |                                                        | family = "cox", alpha = 0, lambda = cv.fit\$lambda.min   |
| <b>Lasso + survival-SVM</b>        | glmnet, survivalsvm   | family = "cox", alpha = 1, lambda = cv.fit\$lambda.min | gamma.mu = 1, opt.meth = "ipop"                          |
| <b>SuperPC</b>                     | superpc               |                                                        | type = 'survival', s0.perc = 0.5                         |
| <b>CoxBoost + Ridge</b>            | CoxBoost, glmnet      | start.penalty=500, maxstepno=500                       | family = "cox", alpha = 0, lambda = cv.fit\$lambda.min   |
| <b>Enet [alpha=0.1]</b>            | glmnet                |                                                        | family = "cox", alpha = 0.1, lambda = cv.fit\$lambda.min |
| <b>CoxBoost + Enet [alpha=0.1]</b> | CoxBoost, glmnet      | start.penalty=500, maxstepno=500                       | family = "cox", alpha = 0.1, lambda = cv.fit\$lambda.min |
| <b>Enet [alpha=0.2]</b>            | glmnet                |                                                        | family = "cox", alpha = 0.2, lambda = cv.fit\$lambda.min |
| <b>Enet [alpha=0.3]</b>            | glmnet                |                                                        | family = "cox", alpha = 0.3, lambda = cv.fit\$lambda.min |
| <b>CoxBoost + Enet [alpha=0.3]</b> | CoxBoost, glmnet      | start.penalty=500, maxstepno=500                       | family = "cox", alpha = 0.3, lambda = cv.fit\$lambda.min |
| <b>CoxBoost + Enet [alpha=0.2]</b> | CoxBoost, glmnet      | start.penalty=500, maxstepno=500                       | family = "cox", alpha = 0.2, lambda = cv.fit\$lambda.min |
| <b>Enet [alpha=0.4]</b>            | glmnet                |                                                        | family = "cox", alpha = 0.4, lambda = cv.fit\$lambda.min |
| <b>CoxBoost + Enet [alpha=0.4]</b> | CoxBoost, glmnet      | start.penalty=500, maxstepno=500                       | family = "cox", alpha = 0.4, lambda = cv.fit\$lambda.min |
| <b>Lasso + CoxBoost</b>            | glmnet, CoxBoost      | family = "cox", alpha = 1, lambda = cv.fit\$lambda.min | start.penalty=500, maxstepno=500                         |
| <b>Enet [alpha=0.5]</b>            | glmnet                |                                                        | family = "cox", alpha = 0.5, lambda = cv.fit\$lambda.min |

|                                     |                              |                                                        |                                                          |
|-------------------------------------|------------------------------|--------------------------------------------------------|----------------------------------------------------------|
| <b>CoxBoost</b>                     | CoxBoost                     |                                                        | start.penalty=500, maxstepno=500                         |
| <b>CoxBoost + Enet [alpha=0.5]</b>  | CoxBoost, glmnet             | start.penalty=500, maxstepno=500                       | family = "cox", alpha = 0.5, lambda = cv.fit\$lambda.min |
| <b>Enet [alpha=0.6]</b>             | glmnet                       |                                                        | family = "cox", alpha = 0.6, lambda = cv.fit\$lambda.min |
| <b>CoxBoost + Enet [alpha=0.6]</b>  | CoxBoost, glmnet             | start.penalty=500, maxstepno=500                       | family = "cox", alpha = 0.6, lambda = cv.fit\$lambda.min |
| <b>CoxBoost + Enet [alpha=0.7]</b>  | CoxBoost, glmnet             | start.penalty=500, maxstepno=500                       | family = "cox", alpha = 0.7, lambda = cv.fit\$lambda.min |
| <b>CoxBoost + Enet [alpha=0.8]</b>  | CoxBoost, glmnet             | start.penalty=500, maxstepno=500                       | family = "cox", alpha = 0.8, lambda = cv.fit\$lambda.min |
| <b>Enet [alpha=0.8]</b>             | glmnet                       |                                                        | family = "cox", alpha = 0.8, lambda = cv.fit\$lambda.min |
| <b>Enet [alpha=0.9]</b>             | glmnet                       |                                                        | family = "cox", alpha = 0.9, lambda = cv.fit\$lambda.min |
| <b>Lasso</b>                        | glmnet                       |                                                        | family = "cox", alpha = 1, lambda = cv.fit\$lambda.min   |
| <b>Enet [alpha=0.7]</b>             | glmnet                       |                                                        | family = "cox", alpha = 0.7, lambda = cv.fit\$lambda.min |
| <b>CoxBoost + Enet [alpha=0.9]</b>  | CoxBoost, glmnet             | start.penalty=500, maxstepno=500                       | family = "cox", alpha = 0.9, lambda = cv.fit\$lambda.min |
| <b>CoxBoost + Lasso</b>             | CoxBoost, glmnet             | start.penalty=500, maxstepno=500                       | family = "cox", alpha = 1, lambda = cv.fit\$lambda.min   |
| <b>Lasso + plsRcox</b>              | glmnet, plsRcox              | family = "cox", alpha = 1, lambda = cv.fit\$lambda.min | nt=10                                                    |
| <b>CoxBoost + plsRcox</b>           | CoxBoost, plsRcox            | start.penalty=500, maxstepno=500                       | nt=10                                                    |
| <b>CoxBoost + StepCox [forward]</b> | CoxBoost, survival           | start.penalty=500, maxstepno=500                       | direction = forward, trace = 0                           |
| <b>Lasso + StepCox [forward]</b>    | glmnet, survival             | family = "cox", alpha = 1, lambda = cv.fit\$lambda.min | direction = forward, trace = 0                           |
| <b>RSF + survival-SVM</b>           | randomForestSRC, survivalsvm | ntree = 1000, nodesize = 2, splitrule = 'logrank'      | gamma.mu = 1, opt.meth = "ipop"                          |
| <b>CoxBoost + SuperPC</b>           | CoxBoost, superpc            | start.penalty=500, maxstepno=500                       | type = 'survival', s0.perc = 0.5                         |
| <b>StepCox [forward]</b>            | survival                     |                                                        | direction = forward, trace = 0                           |

|                                 |                              |                                                        |                                                          |
|---------------------------------|------------------------------|--------------------------------------------------------|----------------------------------------------------------|
| <b>plsRcox</b>                  | plsRcox                      |                                                        | nt=10                                                    |
| <b>RSF + Ridge</b>              | randomForestSRC,<br>glmnet   | ntree = 1000, nodesize = 2, splitrule = 'logrank'      | family = "cox", alpha = 0, lambda = cv.fit\$lambda.min   |
| <b>RSF + Enet [alpha=0.1]</b>   | randomForestSRC,<br>glmnet   | ntree = 1000, nodesize = 2, splitrule = 'logrank'      | family = "cox", alpha = 0.1, lambda = cv.fit\$lambda.min |
| <b>Lasso + SuperPC</b>          | glmnet, superpc              | family = "cox", alpha = 1, lambda = cv.fit\$lambda.min | type = 'survival', s0.perc = 0.5                         |
| <b>RSF + plsRcox</b>            | randomForestSRC,<br>plsRcox  | ntree = 1000, nodesize = 2, splitrule = 'logrank'      | nt=10                                                    |
| <b>RSF + StepCox [forward]</b>  | randomForestSRC,<br>survival | ntree = 1000, nodesize = 2, splitrule = 'logrank'      | direction = forward, trace = 0                           |
| <b>RSF + Enet [alpha=0.2]</b>   | randomForestSRC,<br>glmnet   | ntree = 1000, nodesize = 2, splitrule = 'logrank'      | family = "cox", alpha = 0.2, lambda = cv.fit\$lambda.min |
| <b>RSF + Enet [alpha=0.3]</b>   | randomForestSRC,<br>glmnet   | ntree = 1000, nodesize = 2, splitrule = 'logrank'      | family = "cox", alpha = 0.3, lambda = cv.fit\$lambda.min |
| <b>RSF + Enet [alpha=0.6]</b>   | randomForestSRC,<br>glmnet   | ntree = 1000, nodesize = 2, splitrule = 'logrank'      | family = "cox", alpha = 0.6, lambda = cv.fit\$lambda.min |
| <b>RSF + Lasso</b>              | randomForestSRC,<br>glmnet   | ntree = 1000, nodesize = 2, splitrule = 'logrank'      | family = "cox", alpha = 1, lambda = cv.fit\$lambda.min   |
| <b>RSF + Enet [alpha=0.7]</b>   | randomForestSRC,<br>glmnet   | ntree = 1000, nodesize = 2, splitrule = 'logrank'      | family = "cox", alpha = 0.7, lambda = cv.fit\$lambda.min |
| <b>RSF + Enet [alpha=0.5]</b>   | randomForestSRC,<br>glmnet   | ntree = 1000, nodesize = 2, splitrule = 'logrank'      | family = "cox", alpha = 0.5, lambda = cv.fit\$lambda.min |
| <b>RSF + CoxBoost</b>           | randomForestSRC,<br>CoxBoost | ntree = 1000, nodesize = 2, splitrule = 'logrank'      | start.penalty=500, maxstepno=500                         |
| <b>RSF + Enet [alpha=0.9]</b>   | randomForestSRC,<br>glmnet   | ntree = 1000, nodesize = 2, splitrule = 'logrank'      | family = "cox", alpha = 0.9, lambda = cv.fit\$lambda.min |
| <b>RSF + Enet [alpha=0.4]</b>   | randomForestSRC,<br>glmnet   | ntree = 1000, nodesize = 2, splitrule = 'logrank'      | family = "cox", alpha = 0.4, lambda = cv.fit\$lambda.min |
| <b>RSF + Enet [alpha=0.8]</b>   | randomForestSRC,<br>glmnet   | ntree = 1000, nodesize = 2, splitrule = 'logrank'      | family = "cox", alpha = 0.8, lambda = cv.fit\$lambda.min |
| <b>RSF + StepCox [both]</b>     | randomForestSRC,<br>survival | ntree = 1000, nodesize = 2, splitrule = 'logrank'      | direction = both, trace = 0                              |
| <b>RSF + StepCox [backward]</b> | randomForestSRC,<br>survival | ntree = 1000, nodesize = 2, splitrule = 'logrank'      | direction = backward, trace = 0                          |

|                                              |                   |                                  |                                                                                                        |
|----------------------------------------------|-------------------|----------------------------------|--------------------------------------------------------------------------------------------------------|
| <b>StepCox [both] + Ridge</b>                | survival, glmnet  | direction = both, trace = 0      | family = "cox", alpha = 0, lambda = cv.fit\$lambda.min                                                 |
| <b>StepCox [backward] + Ridge</b>            | survival, glmnet  | direction = backward, trace = 0  | family = "cox", alpha = 0, lambda = cv.fit\$lambda.min                                                 |
| <b>StepCox [both] + plsRcox</b>              | survival, plsRcox | direction = both, trace = 0      | nt=10                                                                                                  |
| <b>StepCox [backward] + plsRcox</b>          | survival, plsRcox | direction = backward, trace = 0  | nt=10                                                                                                  |
| <b>StepCox [both] + Enet [alpha=0.9]</b>     | survival, glmnet  | direction = both, trace = 0      | family = "cox", alpha = 0.9, lambda = cv.fit\$lambda.min                                               |
| <b>StepCox [backward] + Enet [alpha=0.9]</b> | survival, glmnet  | direction = backward, trace = 0  | family = "cox", alpha = 0.9, lambda = cv.fit\$lambda.min                                               |
| <b>StepCox [both] + Enet [alpha=0.1]</b>     | survival, glmnet  | direction = both, trace = 0      | family = "cox", alpha = 0.1, lambda = cv.fit\$lambda.min                                               |
| <b>StepCox [backward] + Enet [alpha=0.1]</b> | survival, glmnet  | direction = backward, trace = 0  | family = "cox", alpha = 0.1, lambda = cv.fit\$lambda.min                                               |
| <b>StepCox [both] + Enet [alpha=0.8]</b>     | survival, glmnet  | direction = both, trace = 0      | family = "cox", alpha = 0.8, lambda = cv.fit\$lambda.min                                               |
| <b>StepCox [backward] + Enet [alpha=0.8]</b> | survival, glmnet  | direction = backward, trace = 0  | family = "cox", alpha = 0.8, lambda = cv.fit\$lambda.min                                               |
| <b>StepCox [both] + Enet [alpha=0.2]</b>     | survival, glmnet  | direction = both, trace = 0      | family = "cox", alpha = 0.2, lambda = cv.fit\$lambda.min                                               |
| <b>StepCox [backward] + Enet [alpha=0.2]</b> | survival, glmnet  | direction = backward, trace = 0  | family = "cox", alpha = 0.2, lambda = cv.fit\$lambda.min                                               |
| <b>StepCox [both] + Lasso</b>                | survival, glmnet  | direction = both, trace = 0      | family = "cox", alpha = 1, lambda = cv.fit\$lambda.min                                                 |
| <b>StepCox [backward] + Lasso</b>            | survival, glmnet  | direction = backward, trace = 0  | family = "cox", alpha = 1, lambda = cv.fit\$lambda.min                                                 |
| <b>StepCox [both] + Enet [alpha=0.6]</b>     | survival, glmnet  | direction = both, trace = 0      | family = "cox", alpha = 0.6, lambda = cv.fit\$lambda.min                                               |
| <b>StepCox [backward] + Enet [alpha=0.6]</b> | survival, glmnet  | direction = backward, trace = 0  | family = "cox", alpha = 0.6, lambda = cv.fit\$lambda.min                                               |
| <b>CoxBoost + GBM</b>                        | CoxBoost, gbm     | start.penalty=500, maxstepno=500 | distribution = 'coxph', n.trees = 10000, interaction.depth = 3, n.minobsinnode = 10, shrinkage = 0.001 |
| <b>StepCox [both] + Enet [alpha=0.7]</b>     | survival, glmnet  | direction = both, trace = 0      | family = "cox", alpha = 0.7, lambda = cv.fit\$lambda.min                                               |

|                                              |                              |                                                        |                                                                                                        |
|----------------------------------------------|------------------------------|--------------------------------------------------------|--------------------------------------------------------------------------------------------------------|
| <b>StepCox [backward] + Enet [alpha=0.7]</b> | survival, glmnet             | direction = backward, trace = 0                        | family = "cox", alpha = 0.7, lambda = cv.fit\$lambda.min                                               |
| <b>Lasso + StepCox [backward]</b>            | glmnet, survival             | family = "cox", alpha = 1, lambda = cv.fit\$lambda.min | direction = backward, trace = 0                                                                        |
| <b>StepCox [both]</b>                        | survival                     |                                                        | direction = both, trace = 0                                                                            |
| <b>StepCox [backward]</b>                    | survival                     |                                                        | direction = backward, trace = 0                                                                        |
| <b>CoxBoost + StepCox [both]</b>             | CoxBoost, survival           | start.penalty=500, maxstepno=500                       | direction = both, trace = 0                                                                            |
| <b>CoxBoost + StepCox [backward]</b>         | CoxBoost, survival           | start.penalty=500, maxstepno=500                       | direction = backward, trace = 0                                                                        |
| <b>StepCox [both] + Enet [alpha=0.4]</b>     | survival, glmnet             | direction = both, trace = 0                            | family = "cox", alpha = 0.4, lambda = cv.fit\$lambda.min                                               |
| <b>StepCox [backward] + Enet [alpha=0.4]</b> | survival, glmnet             | direction = backward, trace = 0                        | family = "cox", alpha = 0.4, lambda = cv.fit\$lambda.min                                               |
| <b>StepCox [both] + Enet [alpha=0.3]</b>     | survival, glmnet             | direction = both, trace = 0                            | family = "cox", alpha = 0.3, lambda = cv.fit\$lambda.min                                               |
| <b>StepCox [backward] + Enet [alpha=0.3]</b> | survival, glmnet             | direction = backward, trace = 0                        | family = "cox", alpha = 0.3, lambda = cv.fit\$lambda.min                                               |
| <b>StepCox [both] + CoxBoost</b>             | survival, CoxBoost           | direction = both, trace = 0                            | start.penalty=500, maxstepno=500                                                                       |
| <b>StepCox [backward] + CoxBoost</b>         | survival, CoxBoost           | direction = backward, trace = 0                        | start.penalty=500, maxstepno=500                                                                       |
| <b>StepCox [both] + Enet [alpha=0.5]</b>     | survival, glmnet             | direction = both, trace = 0                            | family = "cox", alpha = 0.5, lambda = cv.fit\$lambda.min                                               |
| <b>StepCox [backward] + Enet [alpha=0.5]</b> | survival, glmnet             | direction = backward, trace = 0                        | family = "cox", alpha = 0.5, lambda = cv.fit\$lambda.min                                               |
| <b>CoxBoost + RSF</b>                        | CoxBoost,<br>randomForestSRC | start.penalty=500, maxstepno=500                       | ntree = 1000, nodesize = 2, splitrule = 'logrank'                                                      |
| <b>RSF + SuperPC</b>                         | randomForestSRC,<br>superpc  | ntree = 1000, nodesize = 2, splitrule = 'logrank'      | type = 'survival', s0.perc = 0.5                                                                       |
| <b>RSF</b>                                   | randomForestSRC              |                                                        | ntree = 1000, nodesize = 2, splitrule = 'logrank'                                                      |
| <b>Lasso + GBM</b>                           | glmnet, gbm                  | family = "cox", alpha = 1, lambda = cv.fit\$lambda.min | distribution = 'coxph', n.trees = 10000, interaction.depth = 3, n.minobsinnode = 10, shrinkage = 0.001 |

|                                          |                           |                                                        |                                                                                                        |
|------------------------------------------|---------------------------|--------------------------------------------------------|--------------------------------------------------------------------------------------------------------|
| <b>RSF + GBM</b>                         | randomForestSRC, gbm      | ntree = 1000, nodesize = 2, splitrule = 'logrank'      | distribution = 'coxph', n.trees = 10000, interaction.depth = 3, n.minobsinnode = 10, shrinkage = 0.001 |
| <b>GBM</b>                               | gbm                       |                                                        | distribution = 'coxph', n.trees = 10000, interaction.depth = 3, n.minobsinnode = 10, shrinkage = 0.001 |
| <b>StepCox [both] + survival-SVM</b>     | survival, survivalsvm     | direction = both, trace = 0                            | gamma.mu = 1, opt.meth = "ipop"                                                                        |
| <b>StepCox [backward] + survival-SVM</b> | survival, survivalsvm     | direction = backward, trace = 0                        | gamma.mu = 1, opt.meth = "ipop"                                                                        |
| <b>Lasso + RSF</b>                       | glmnet, randomForestSRC   | family = "cox", alpha = 1, lambda = cv.fit\$lambda.min | ntree = 1000, nodesize = 2, splitrule = 'logrank'                                                      |
| <b>StepCox [both] + GBM</b>              | survival, gbm             | direction = both, trace = 0                            | distribution = 'coxph', n.trees = 10000, interaction.depth = 3, n.minobsinnode = 10, shrinkage = 0.001 |
| <b>StepCox [backward] + GBM</b>          | survival, gbm             | direction = both, trace = 0                            | distribution = 'coxph', n.trees = 10000, interaction.depth = 3, n.minobsinnode = 10, shrinkage = 0.001 |
| <b>StepCox [both] + RSF</b>              | survival, randomForestSRC | direction = both, trace = 0                            | ntree = 1000, nodesize = 2, splitrule = 'logrank'                                                      |
| <b>StepCox [backward] + RSF</b>          | survival, randomForestSRC | direction = backward, trace = 0                        | ntree = 1000, nodesize = 2, splitrule = 'logrank'                                                      |
| <b>StepCox [both] + SuperPC</b>          | survival, superpc         | direction = both, trace = 0                            | type = 'survival', s0.perc = 0.5                                                                       |
| <b>StepCox [backward] + SuperPC</b>      | survival, superpc         | direction = backward, trace = 0                        | type = 'survival', s0.perc = 0.5                                                                       |
| <b>Lasso + StepCox [both]</b>            | glmnet, survival          | family = "cox", alpha = 1, lambda = cv.fit\$lambda.min | direction = both, trace = 0                                                                            |
